# Supplementary material for: Characterization of Equine Parvovirus in Thoroughbred Breeding Horses from Germany
Source: MDPI journal article supplement (doi:10.3390/v11100965), 2019-10-18
Supplement: s1 [file s1]

## Supplement

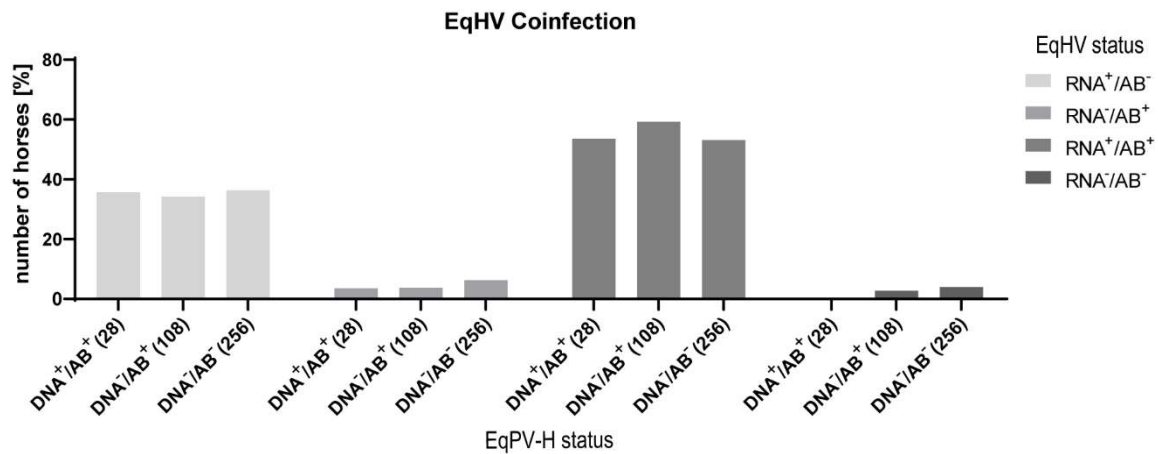

**Supplementary Figure S1.** Correlation between EqPV-H and EqHV status of thoroughbreds. The EqPV-H status is displayed on the abscissa with the EqHV status shown in four shades of grey. Data for EqHV RNA and seroprevalence were obtained during a previous study [18].

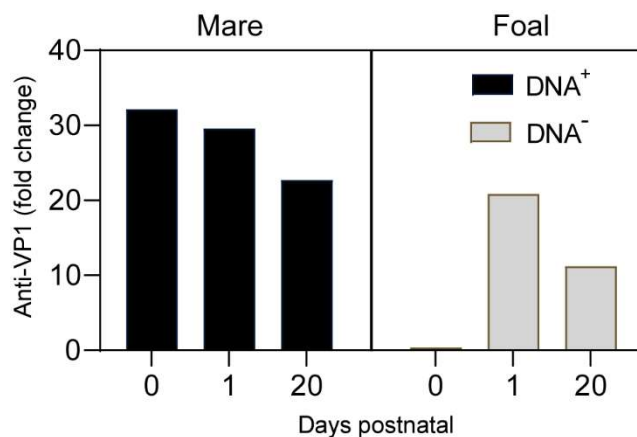

**Supplementary Figure S2.** Postnatal serum samples from a foal and an EqPV-H-positive mare were evaluated for the presence of EqPV-H VP1 antibodies and DNA at the indicated times using a luciferase immunoprecipitation (LIPS) assay and the relative increase of RLU compared to an EqPV-H-negative control sample was calculated.
